# Supplementary material for: A genomic perspective on the potential of termite-associated Cellulosimicrobium cellulans MP1 as producer of plant biomass-acting enzymes and exopolysaccharides
Source: PeerJ. 2021 Jul 28;9:e11839. doi: 10.7717/peerj.11839 (PMC8325422; doi:10.7717/peerj.11839)
Supplement: Supplemental Information 1 [file peerj-09-11839-s001.xlsx]

## Sheet: Raw data - Figure 6
Raw data for Figure 6
Time	Endoglucanase (IU/ml)					Xylanase (IU/ml)					Pectinase (IU/ml)
	1st experiment	2nd experiment	3rd experiment	Average	Standard deviation	1st experiment	2nd experiment	3rd experiment	Average	Standard deviation	1st experiment	2nd experiment	3rd experiment	Average	Standard deviation
24 h	0.157	0.141	0.162	0.153333	0.0109697	0.069	0.051	0.058	0.0593333	0.00907377	0.081	0.093	0.086	0.0866667	0.00602771
48 h	1.857	1.785	1.967	1.86967	0.0916588	0.921	1.147	1.106	1.058	0.120403	0.158	0.141	0.17	0.156333	0.0145717
72 h	3.157	3.269	3.079	3.16833	0.0955057	1.209	1.47	1.303	1.32733	0.132191	0.108	0.09	0.098	0.0986667	0.0090185
96 h	3.057	3.157	2.978	3.064	0.0897051	1.882	1.899	1.746	1.84233	0.083859	0.068	0.069	0.063	0.0666667	0.00321455
120 h	1.234	1.564	1.397	1.39833	0.165004	1.53443	1.5662	1.552	1.55088	0.0159142	0.054	0.053	0.063	0.0566667	0.00550757
