# Supplementary material for: A genomic perspective on the potential of termite-associated Cellulosimicrobium cellulans MP1 as producer of plant biomass-acting enzymes and exopolysaccharides
Source: PeerJ. 2021 Jul 28;9:e11839. doi: 10.7717/peerj.11839 (PMC8325422; doi:10.7717/peerj.11839)
Supplement: Supplemental Information 2 [file peerj-09-11839-s002.xlsx]

## Sheet: Raw data for Figure 7
	Time (h)	100 g/l sucrose			150 g/l sucrose			200 g/l sucrose
		Levan (g/l)	Levan (g/l)		Levan (g/l)	Levan (g/l)		Levan (g/l)	Levan (g/l)
			Average	Standard deviation		Average	Standard deviation		Average	Standard deviation
	0	0	0	0	0	0	0	0	0	0
		0			0			0
		0			0			0
	12	5.066	5.001	0.0736546	8.383	8.27867	0.113993	11.925	11.4553	0.546169
		5.016			8.296			10.856
		4.921			8.157			11.585
	16	7.236	7.21567	0.0215948	11.116	10.6313	0.466682	14.525	13.5877	0.890862
		7.218			10.185			12.752
		7.193			10.593			13.486
	20	10.031	9.942	0.106504	12.016	11.815	0.286456	16.11	14.783	1.16194
		9.971			11.942			13.948
		9.824			11.487			14.291
	24	5.516	5.50967	0.0212211	7.595	7.334	0.227699	12.958	11.8907	0.934582
		5.527			7.231			11.219
		5.486			7.176			11.495
