# Supplementary material for: A genomic perspective on the potential of termite-associated Cellulosimicrobium cellulans MP1 as producer of plant biomass-acting enzymes and exopolysaccharides
Source: PeerJ. 2021 Jul 28;9:e11839. doi: 10.7717/peerj.11839 (PMC8325422; doi:10.7717/peerj.11839)
Supplement: Supplemental Information 3 [file peerj-09-11839-s003.xlsx]

## Sheet: Raw data for Figure S1
Raw data for Figure S1
CMCase (IU/ml)
Time (h)	1st experiment	2nd experiment	3rd experiment	Average	Standard deviation
24	0.136	0.14	0.05	0.108667	0.0508462
48	0.652	0.52	0.82	0.664	0.15036
72	0.54	0.669	0.482	0.563667	0.0957201
96	0.433	0.53	0.641	0.534667	0.104078
FPase (FPU/ml)
Time (h)	1st experiment	2nd experiment	3rd experiment	Average	Standard deviation
24	0.065	0.045	0.075	0.0616667	0.0152753
48	0.14	0.08	0.189	0.136333	0.0545924
72	0.449	0.291	0.261	0.333667	0.101002
96	0.223	0.31	0.12	0.217667	0.0951122
